# Supplementary material for: Sex differences in adverse drug reactions reported to the National Pharmacovigilance Centre in the Netherlands: An explorative observational study
Source: PubMed Central journal article supplement — Br J Clin Pharmacol. 2019 Apr 29;85(7):1507–15. doi: 10.1111/bcp.13923 (PMC6595313; doi:10.1111/bcp.13923), 2019-04-29
Supplement: BCP-85-1507-s001.pdf [file BCP-85-1507-s001.pdf]

## Alimentary tract and metabolim (A)

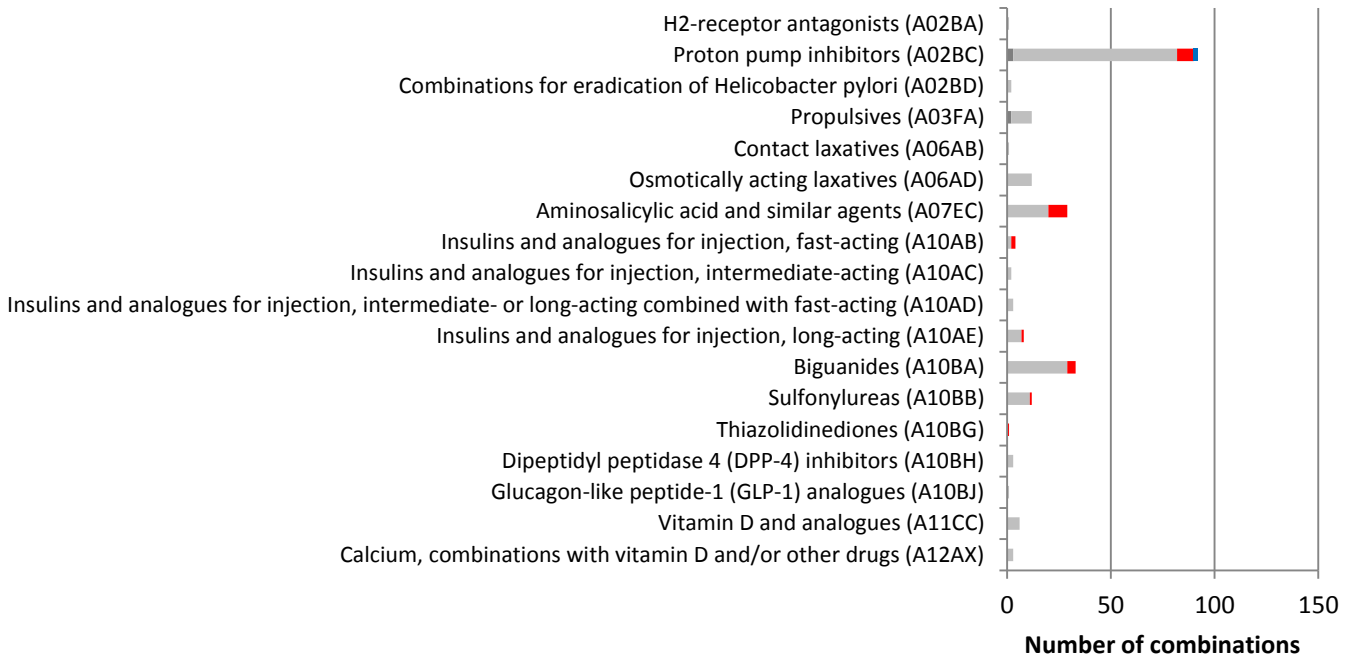

## Blood and blood forming organs (B)

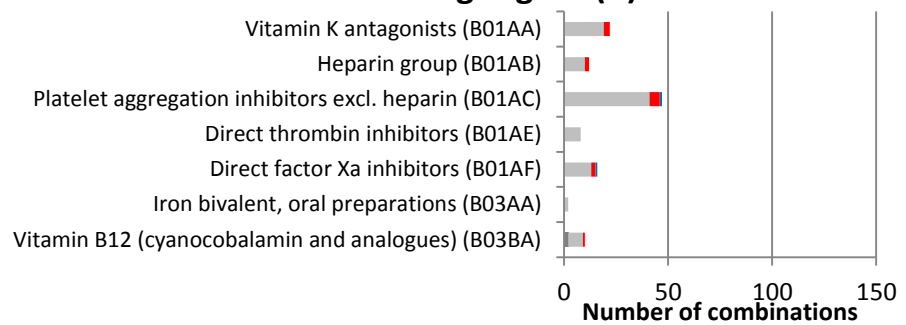

## Cardiovascular system (C)

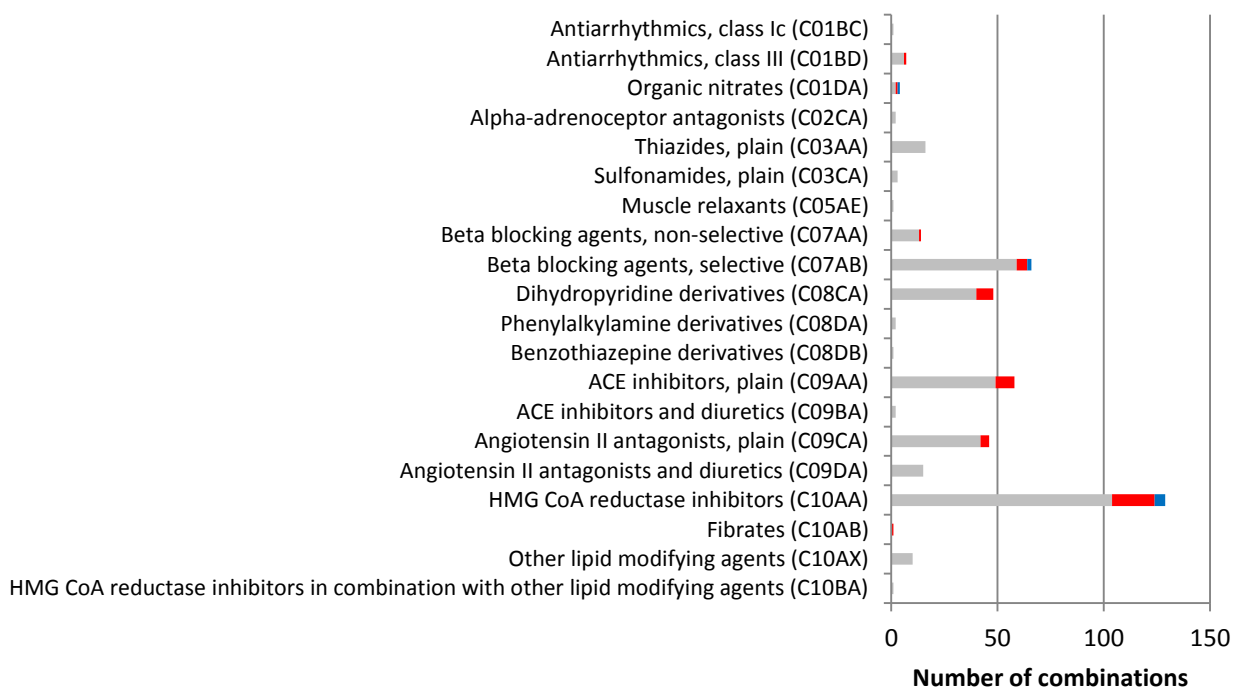

## Dermatologicals (D)

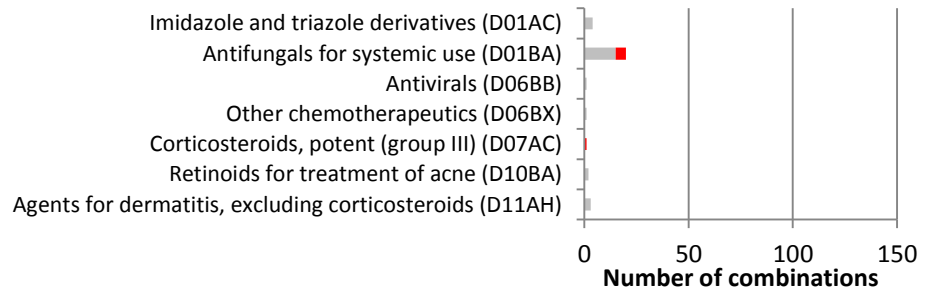

## Genito urinary system and sex hormones (G)

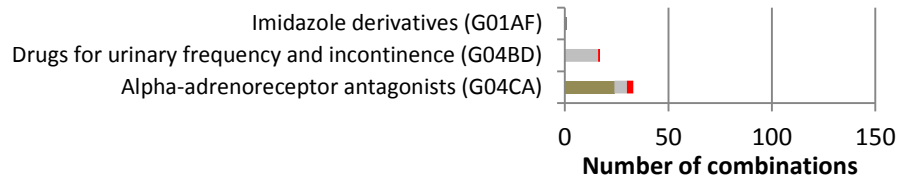

## Systemic hormonal preparations, excl. sex hormones and insulins (H)

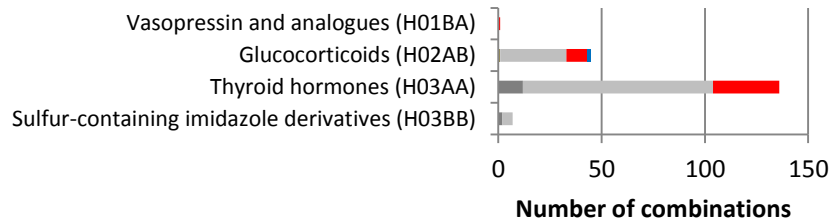

## Antiinfectives for systemic use (J)

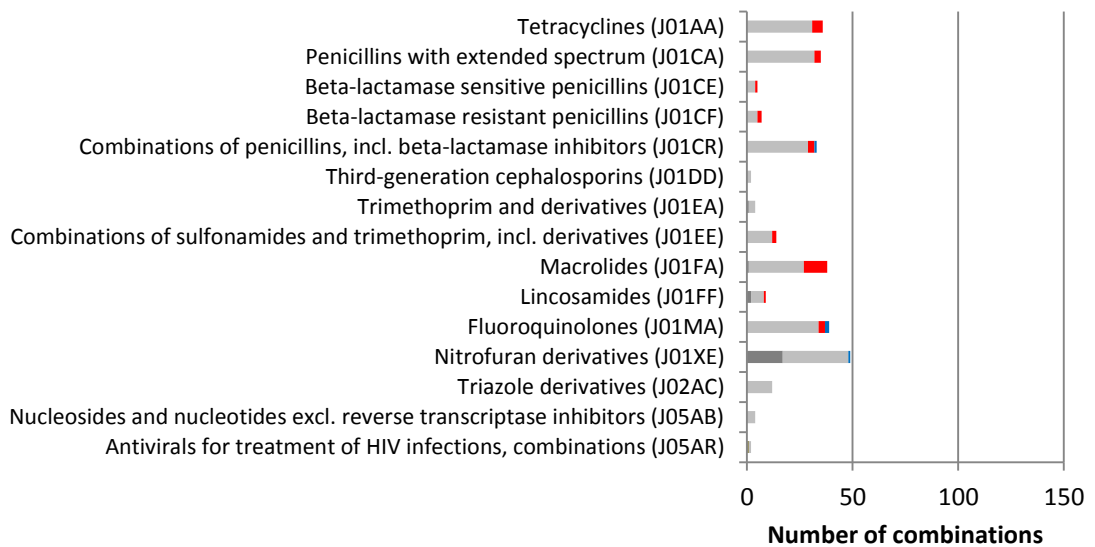

## Antineoplastic and immunomodulating agents (L)

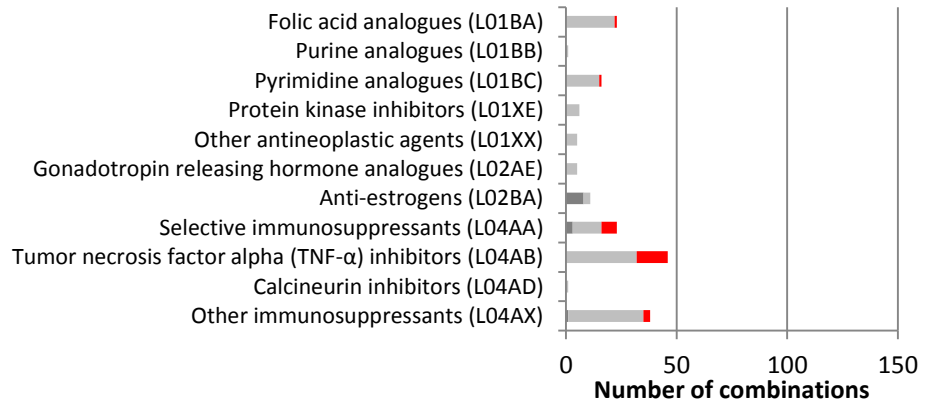

## Musculo-skeletal system (M)

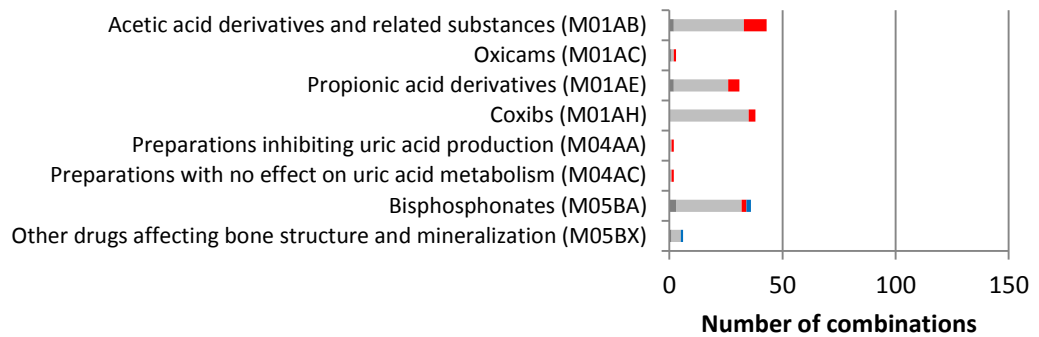

## Nervous system (N)

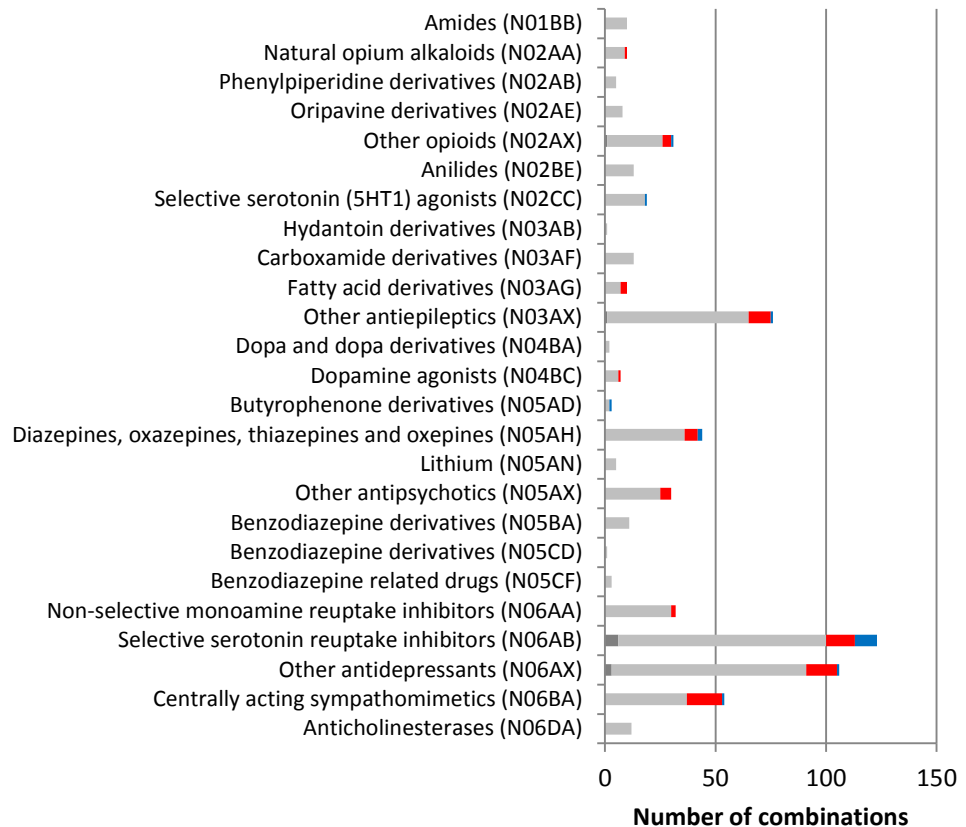

## Antiparasitic products, insecticides and repellents (P)

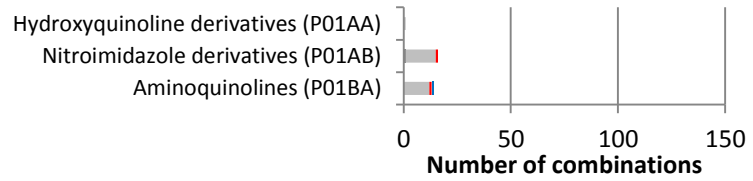

## Respiratory system (R)

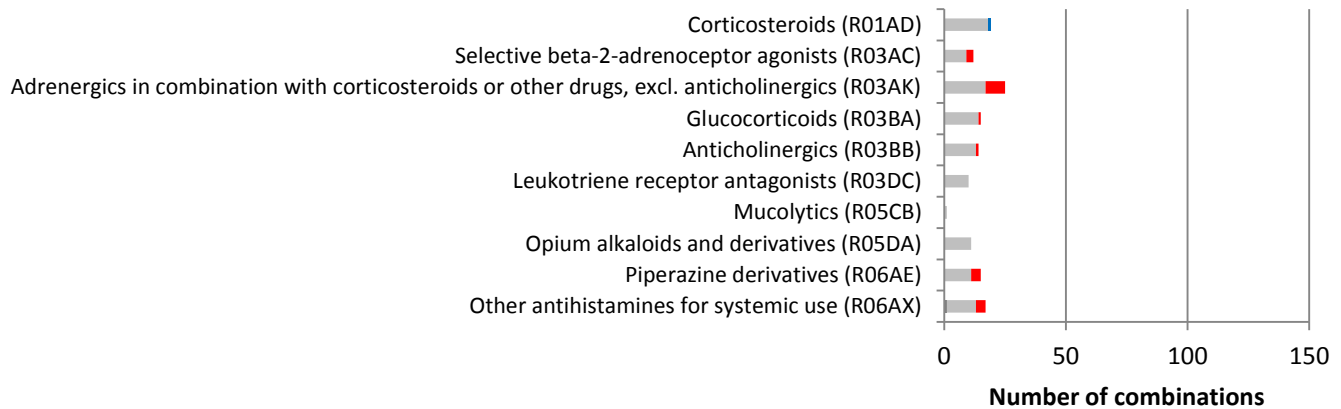

## Various (V)

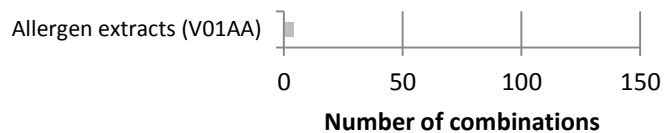

- Combinations with 0 cases in men
- Combinations with 0 cases in women
- Not significant
- Women
- Men

**Supplemental Figure 1.** Overview of number of combinations per drug class ordered at the first level of the Anatomical Therapeutic Chemical (ATC) code.
