# Supplementary material for: Sex differences in adverse drug reactions reported to the National Pharmacovigilance Centre in the Netherlands: An explorative observational study
Source: PubMed Central journal article supplement — Br J Clin Pharmacol. 2019 Apr 29;85(7):1507–15. doi: 10.1111/bcp.13923 (PMC6595313; doi:10.1111/bcp.13923), 2019-04-29
Supplement: BCP-85-1507-s002.pdf [file BCP-85-1507-s002.pdf]

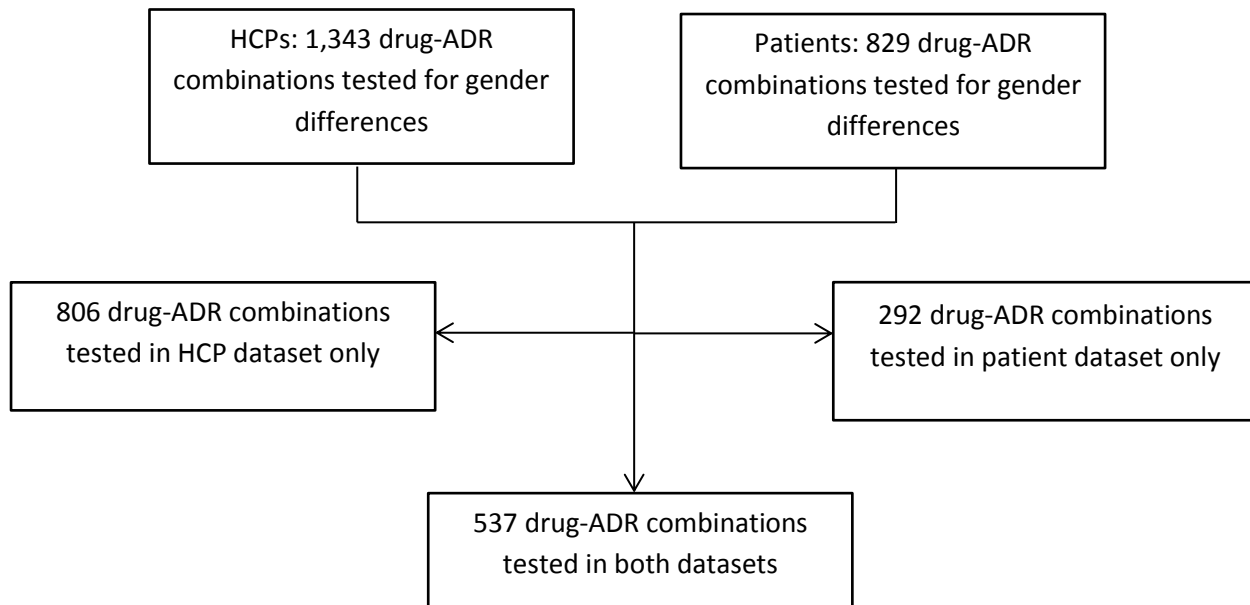

|             |                        | <b>Patients</b>                                                           |                                                                     |
|-------------|------------------------|---------------------------------------------------------------------------|---------------------------------------------------------------------|
|             |                        | <i>Significant</i>                                                        | <i>Not significant</i>                                              |
| <b>HCPs</b> | <i>Significant</i>     | 28 (5%)<br>(Higher risk men: 2, higher risk women: 24, opposite risks: 2) | 58 (11%)<br>(Higher risk men: 9 (16%), higher risk women: 49 (84%)) |
|             | <i>Not significant</i> | 82 (15%)<br>(Higher risk men: 6 (7%), higher risk women: 76 (93%))        | 369 (69%)                                                           |

**Supplemental Figure 2.** Comparison of drug-adverse drug reaction (ADR) combinations tested in reports sent by patients and healthcare professionals.
