# Supplementary material for: Sex differences in adverse drug reactions reported to the National Pharmacovigilance Centre in the Netherlands: An explorative observational study
Source: PubMed Central journal article supplement — Br J Clin Pharmacol. 2019 Apr 29;85(7):1507–15. doi: 10.1111/bcp.13923 (PMC6595313; doi:10.1111/bcp.13923), 2019-04-29
Supplement: BCP-85-1507-s003.pdf [file BCP-85-1507-s003.pdf]

## Blood and lymphatic system disorders

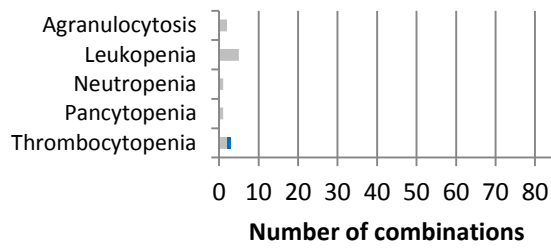

## Cardiac disorders

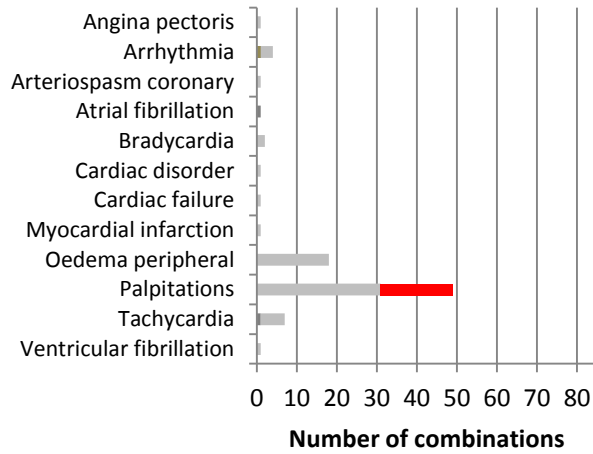

## Ear and labyrinth disorders

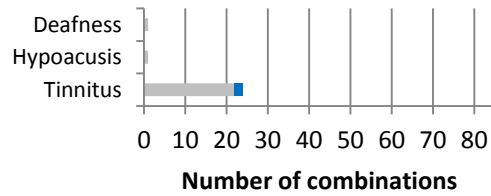

## Endocrine disorders

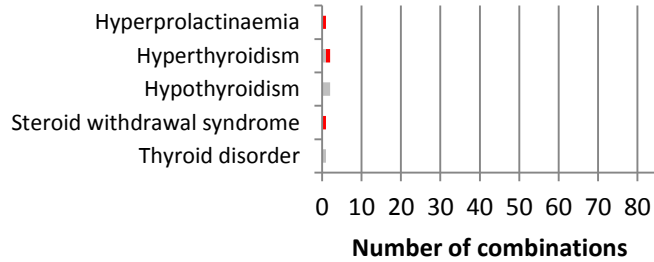

## Eye disorders

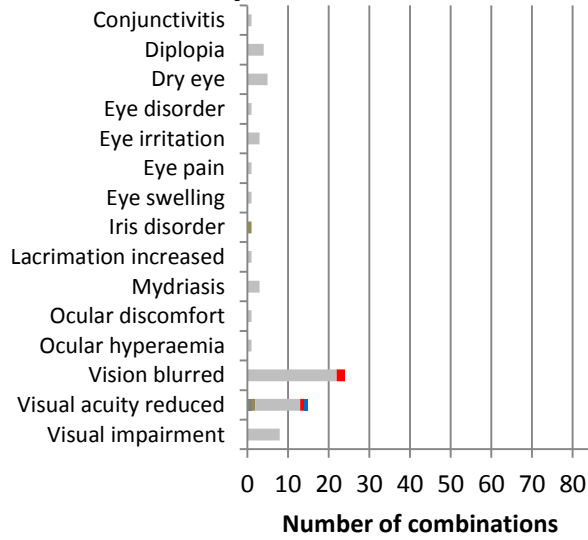

## Gastrointestinal disorders

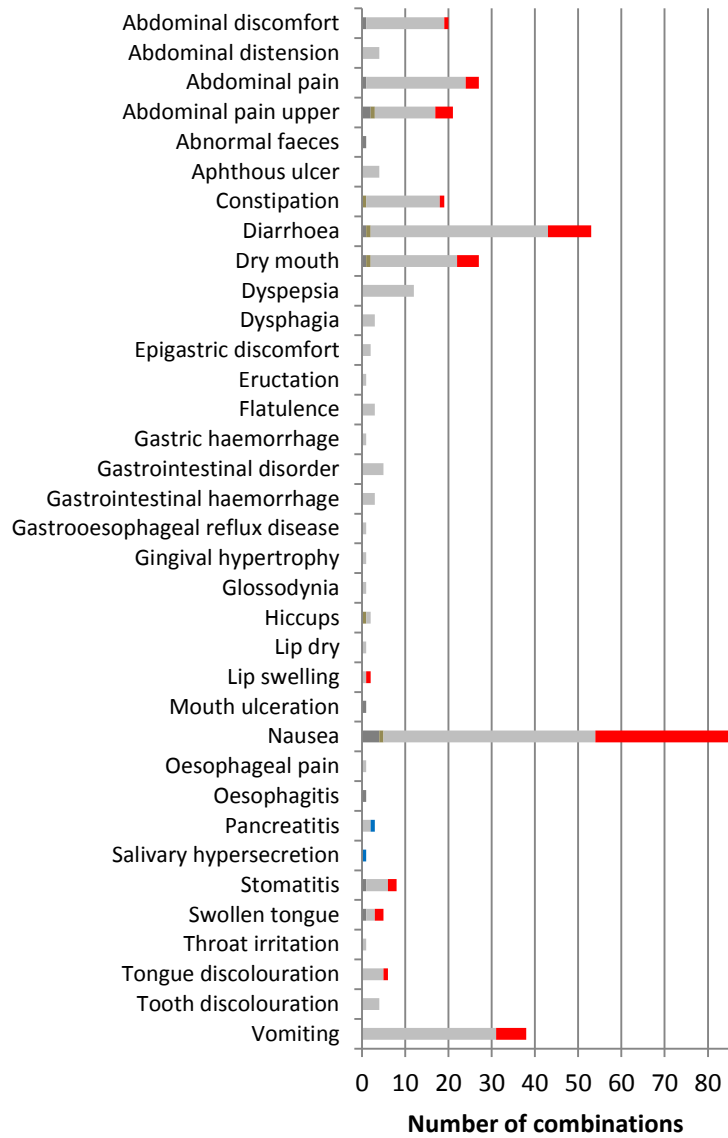

## General disorders and administration site conditions

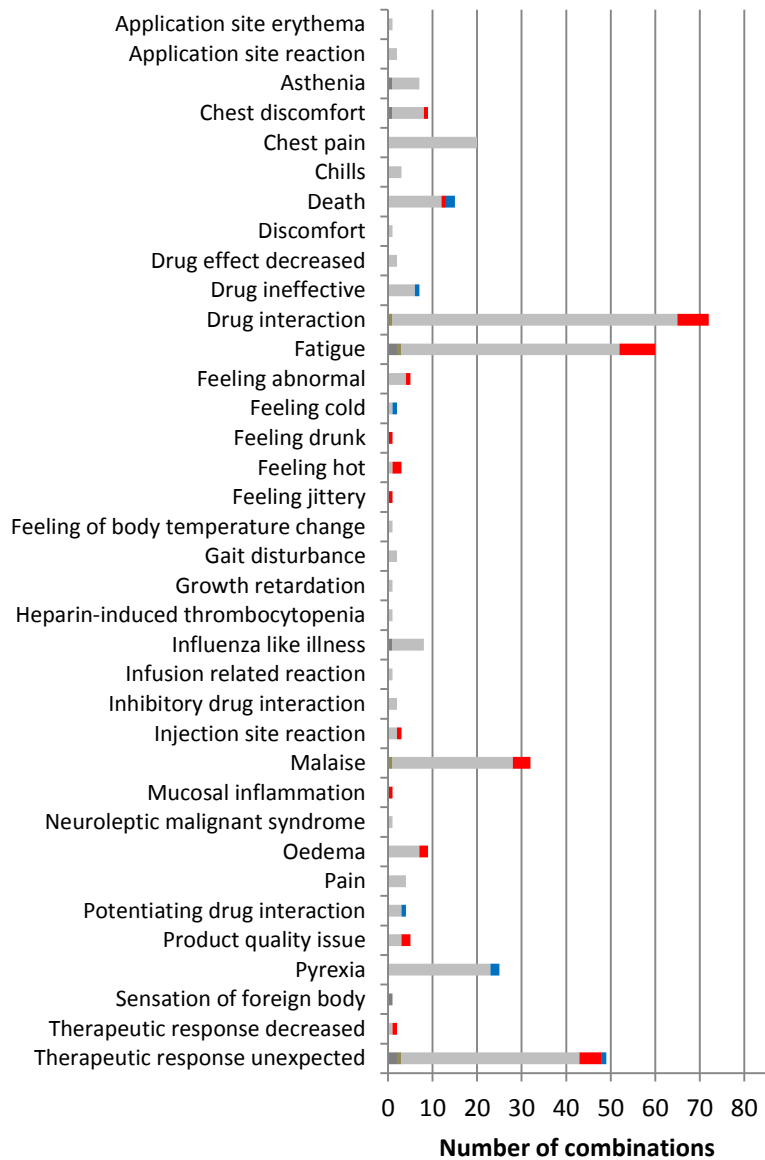

## Hepatobiliary disorders

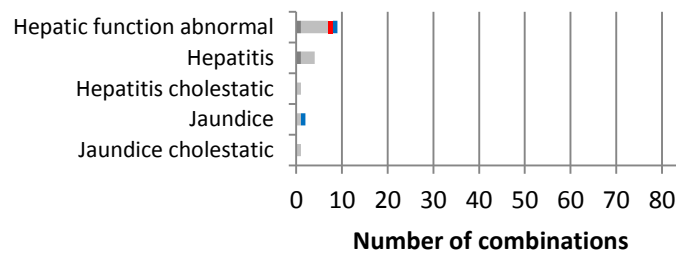

### Immune system disorders

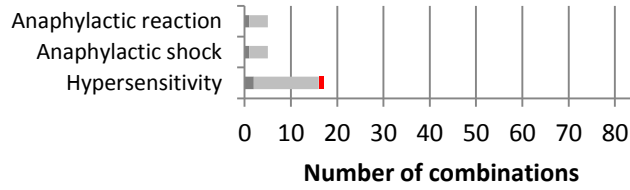

### Infections and infestations

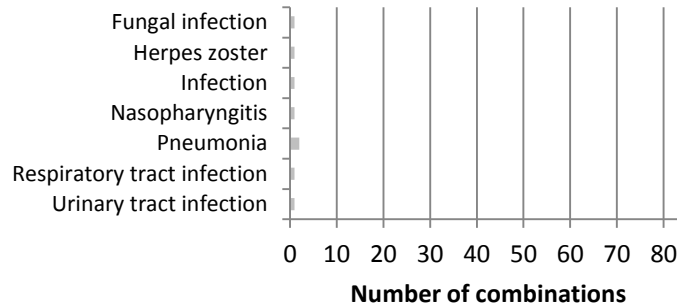

### Injury, poisoning and procedural complications

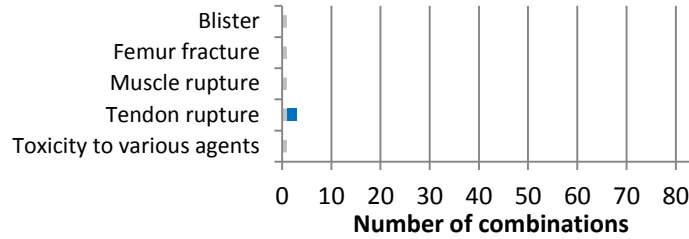

### Investigations

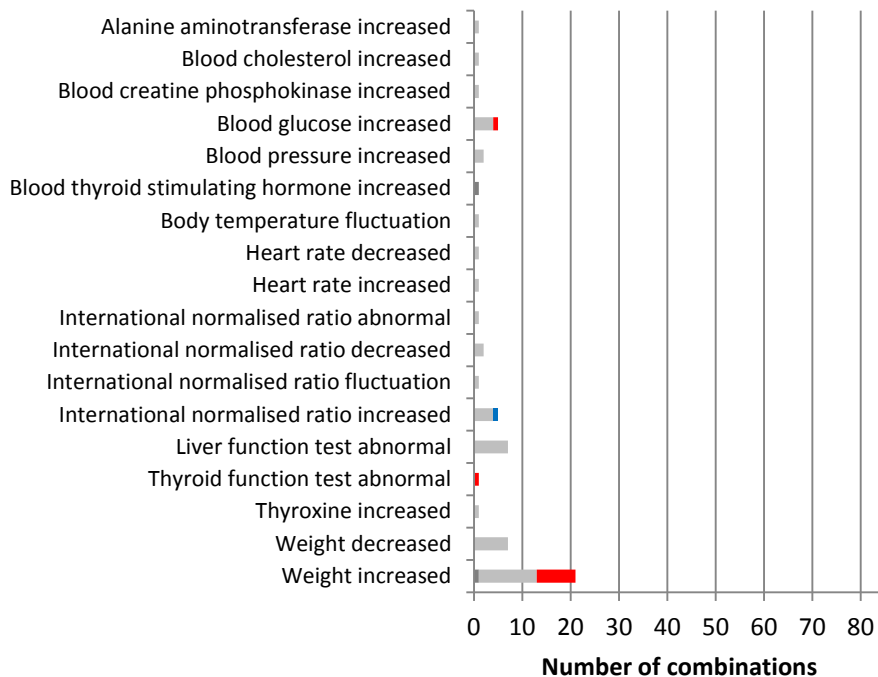

### Metabolism and nutrition disorders

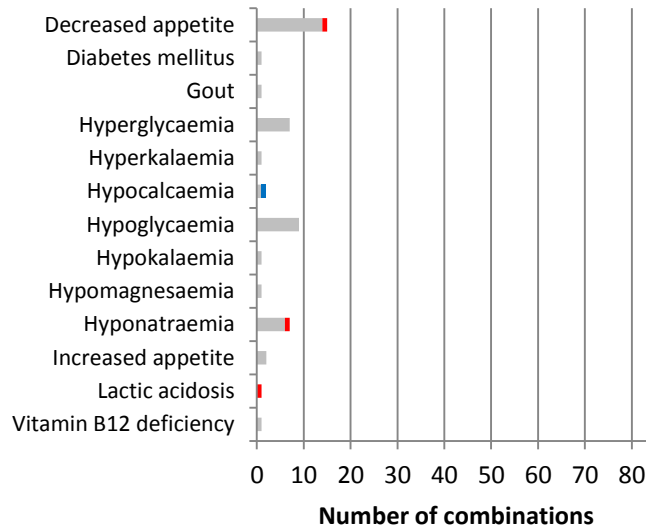

### Musculoskeletal and connective tissue disorders

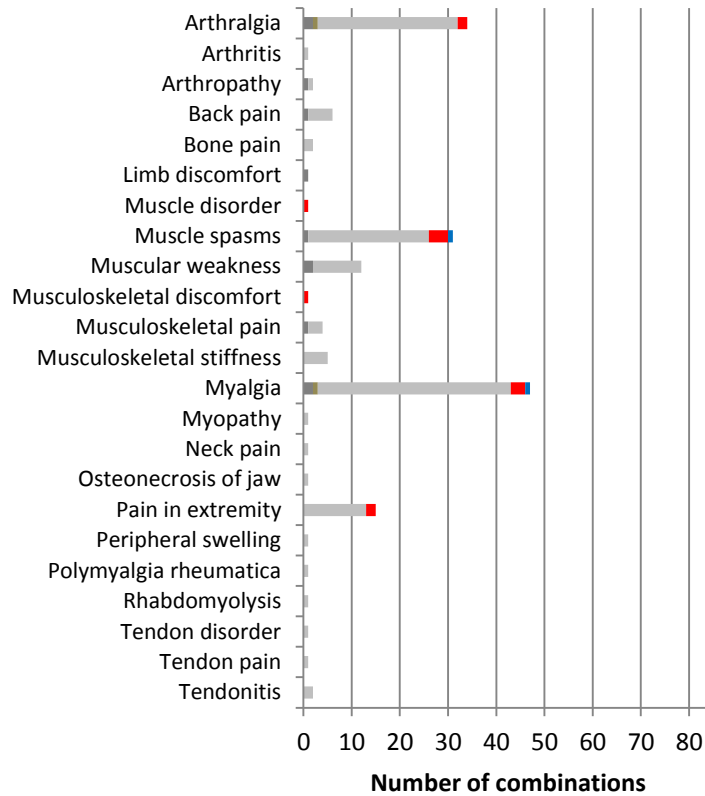

### Neoplasms benign, malignant and unspecified (incl cysts and polyps)

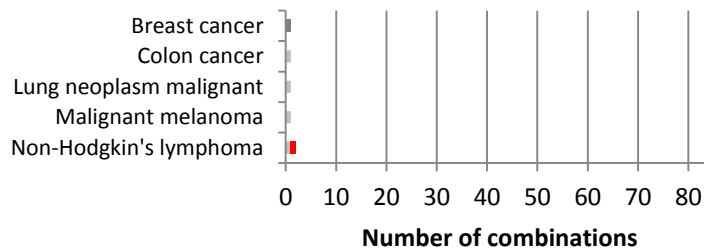

## Nervous system disorders

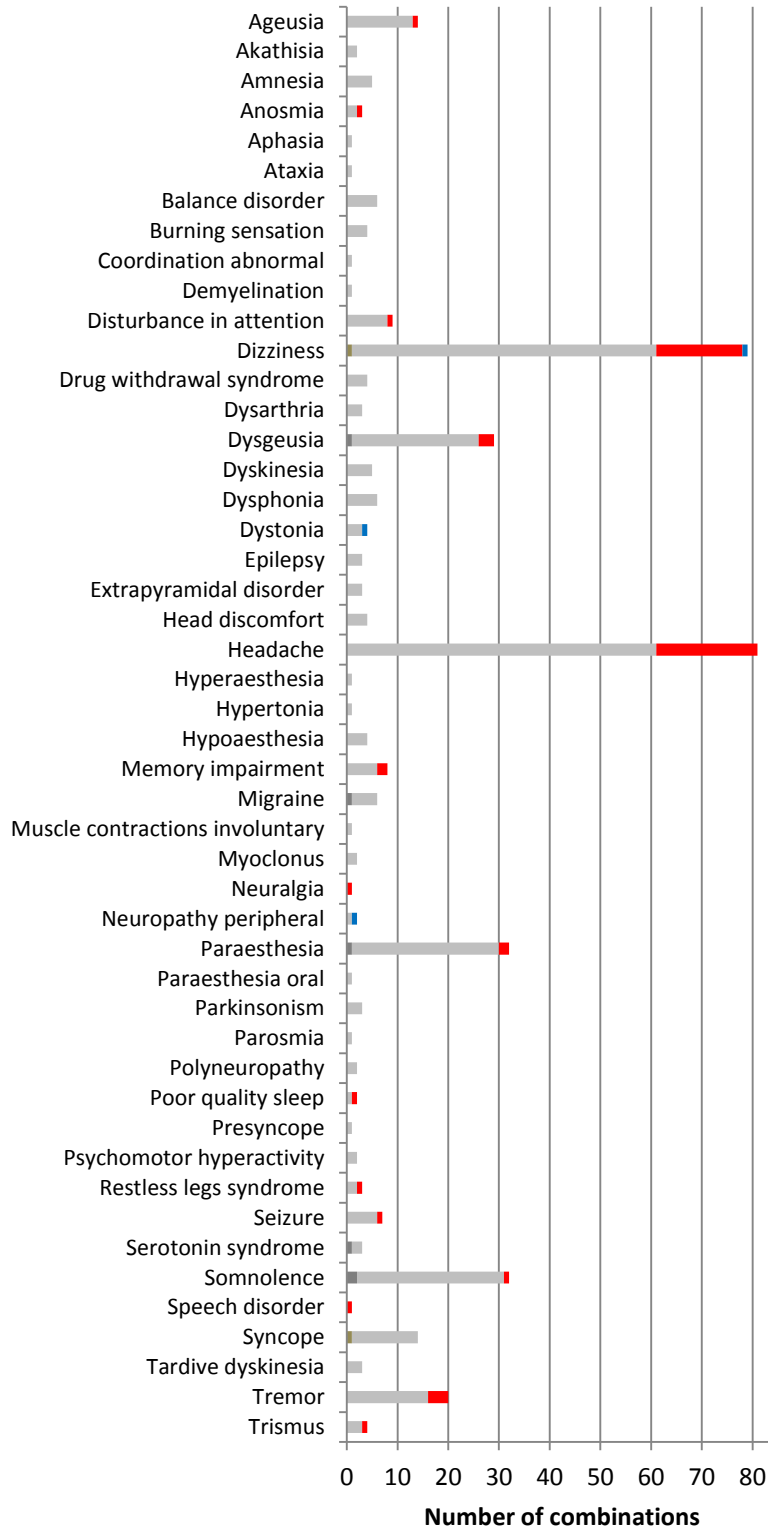

## Psychiatric disorders

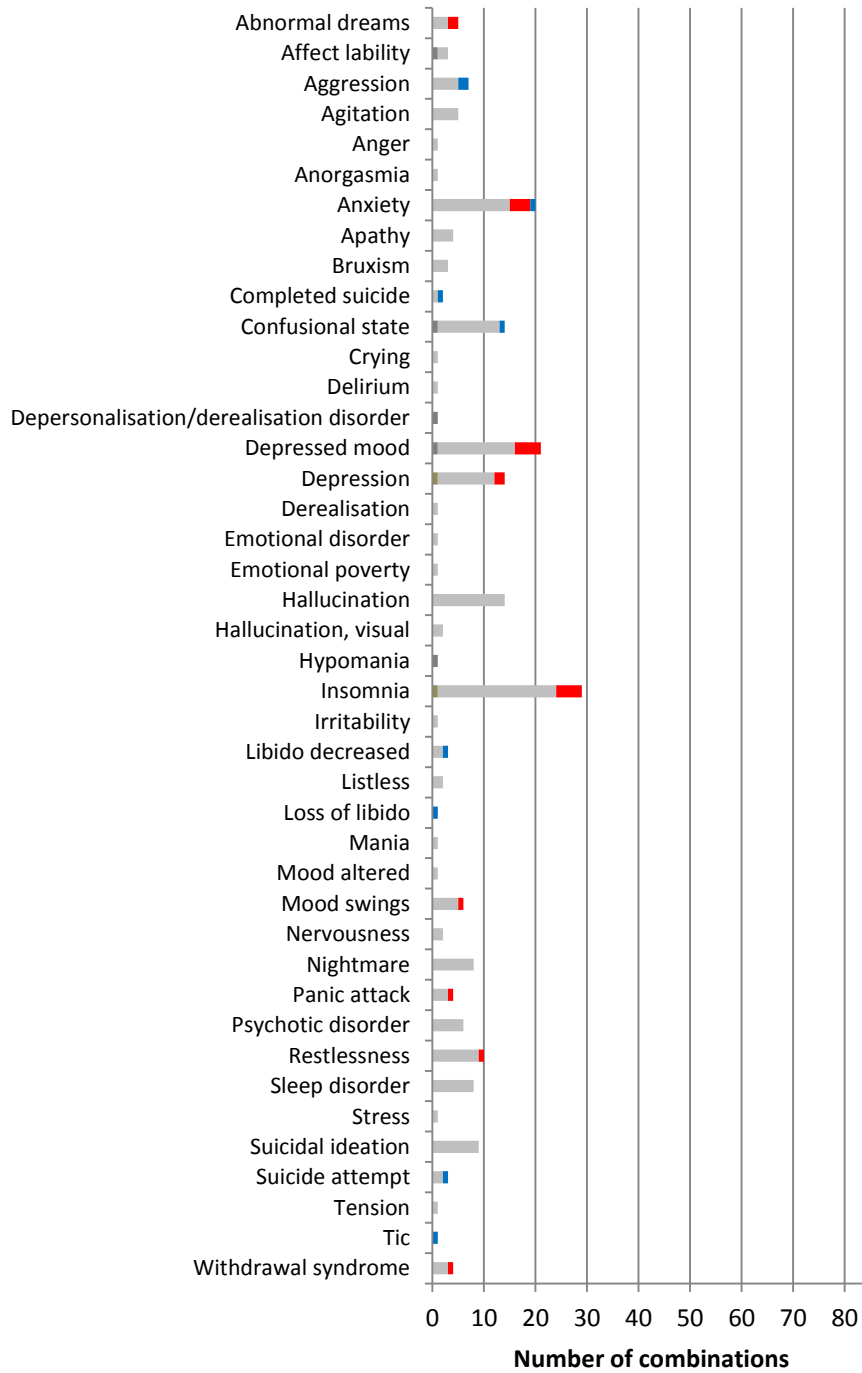

## Renal and urinary disorders

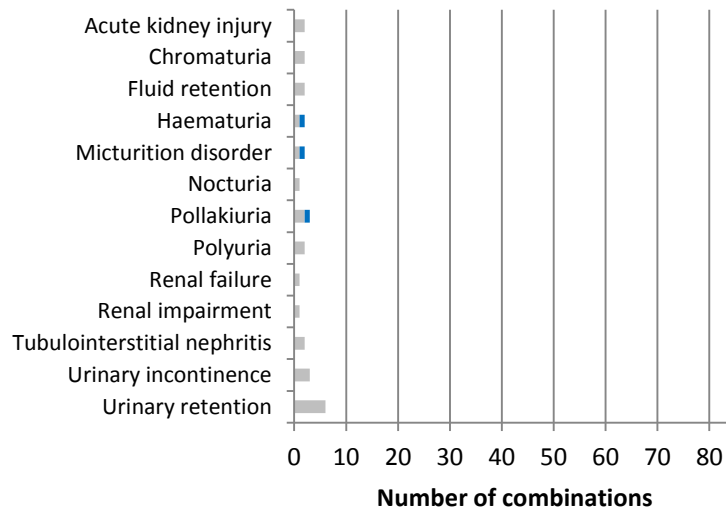

### Reproductive system and breast disorders

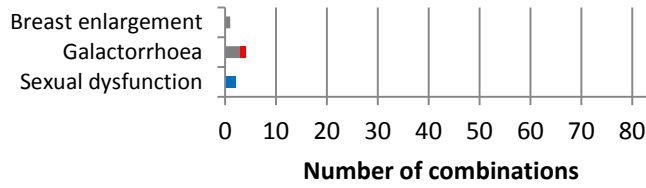

### Respiratory, thoracic and mediastinal disorders

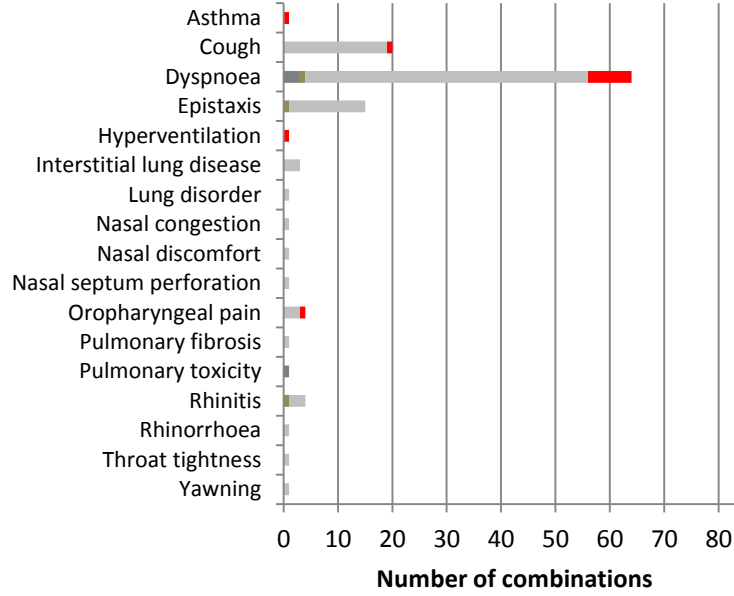

### Skin and subcutaneous tissue disorders

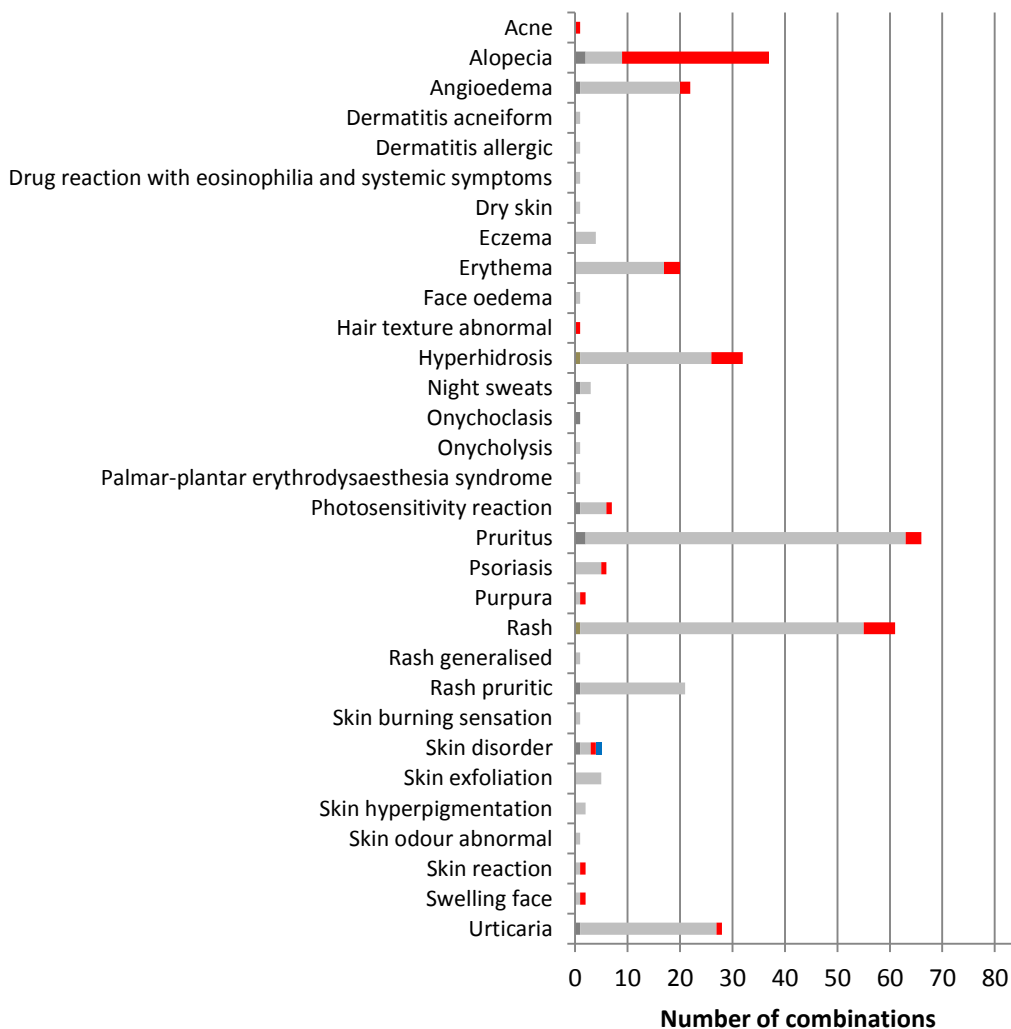



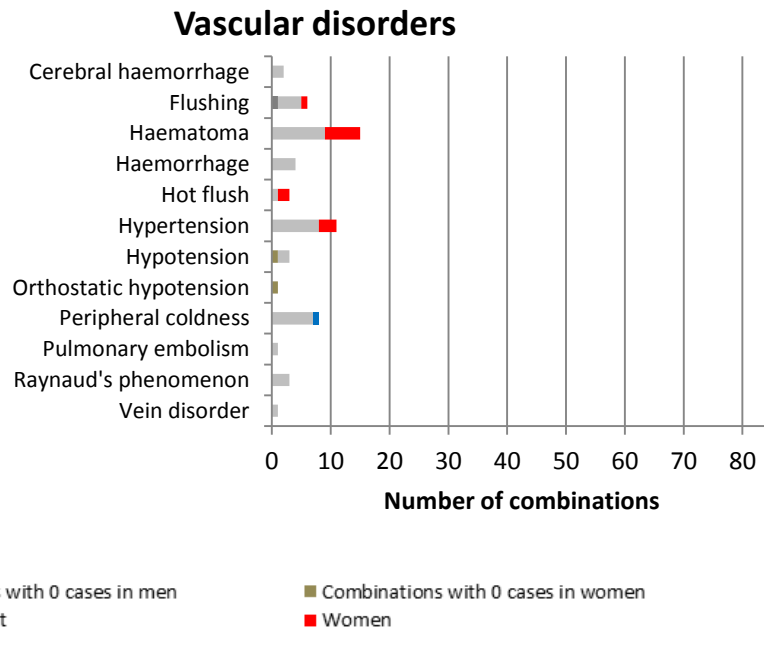

**Supplemental Figure 2.** Overview of number of combinations per adverse drug reaction by System Organ Class.
